# Supplementary material
Source: PubMed Central journal article supplement (PMC7333907)
Supplement: rsfs20190137supp1.pdf [file rsfs20190137supp1.pdf]

# COPSE model description

As published in Tostevin and Mills (2020), Royal Society Interface Focus. This version combines various extensions of the most recent major COPSE model version (Lenton et al. 2018). Full list of additions:

- Extension of forcings into Neoproterozoic and improved weathering-climate relationships (Mills et al., 2019).
- Introduction of reduced gas flux as a sink for O<sub>2</sub> and parallel Monte-Carlo ensemble computation (Williams et al. 2019).
- Added bioturbation effects on C burial and P recycling (van de Velde et al. 2018).
- Added marine DOC reservoir, DOC oxidation flux and input of sulfur in the Ediacaran (Shields et al. 2019)

## 1. Model structure

The model uses a single box to represent the atmosphere and ocean, and boxes to represent the sedimentary inventories of the different chemical species. There are no spatial dimensions.

## 2. Model species

Model species are shown in table 1 below. Each inventory is allowed to evolve during the model run. A schematic representation of the model is shown in Figure 1.

| Description                     | Name | Exists in box | Size at present              |
|---------------------------------|------|---------------|------------------------------|
| Atmospheric CO <sub>2</sub>     | A    | Hydrosphere   | $3.193 \times 10^{18}$ mol C |
| Buried organic C                | G    | Crust         | $1.25 \times 10^{21}$ mol C  |
| Buried carbonate C              | C    | Crust         | $5.0 \times 10^{21}$ mol C   |
| Ocean sulfate                   | S    | Hydrosphere   | $4 \times 10^{19}$ mol S     |
| Buried pyrite sulfur            | PYR  | Crust         | $1.8 \times 10^{20}$ mol S   |
| Buried gypsum sulfur            | GYP  | Crust         | $2.0 \times 10^{20}$ mol S   |
| Ocean phosphate                 | P    | Hydrosphere   | $3.1 \times 10^{15}$ mol P   |
| Ocean nitrate                   | N    | Hydrosphere   | $4.35 \times 10^{16}$ mol N  |
| Atmospheric oxygen              | O    | Hydrosphere   | $3.7 \times 10^{19}$ mol O   |
| Marine dissolved organic carbon | DOC  | Hydrosphere   | $1.5 \times 10^{20}$ mol C   |

21

22

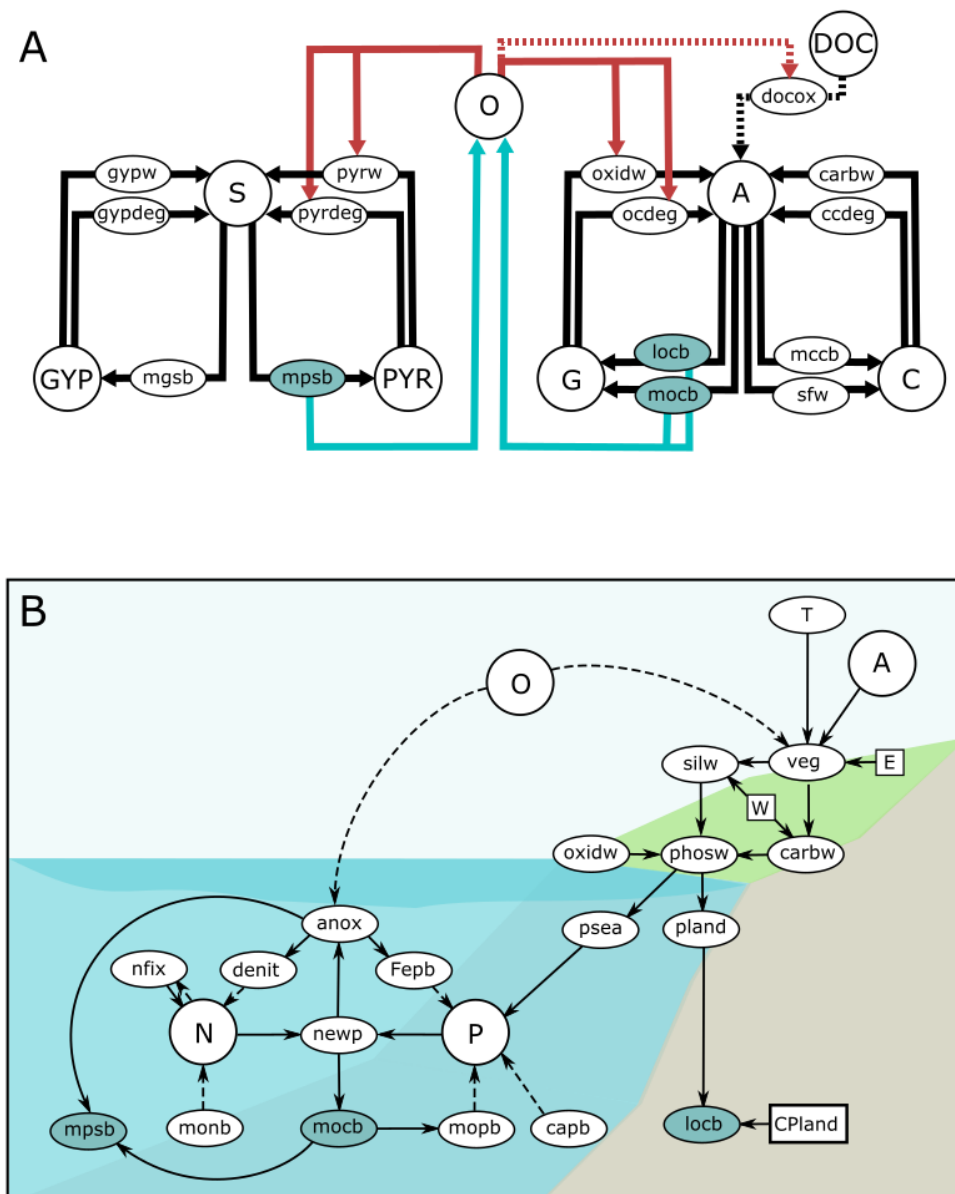

23  
24

25 **Figure 1. COPSE model schematic: a.** Carbon, Sulphur and Oxygen cycle fluxes. Here  
 26 arrows show mass fluxes, blue arrows show oxygen sources and red arrows show oxygen  
 27 sinks. Dashed lines show DOC reservoir fluxes. **B.** Dynamic nutrient and biosphere system.  
 28 Here arrows show positive/direct (solid) or negative/inverse (dashed) relationships between  
 29 major model processes. In both diagrams blue ovals show burial fluxes of organic carbon and  
 30 pyrite sulphur, which are the long-term sources of free oxygen.

31  
32

### 33 3. Differential equations

34 The following equations dictate the inputs and outputs of each of the model reservoirs.

35 Marine phosphate:

$$36 \frac{dP}{dx} = psea - f_{mopb} - f_{capb} - f_{fepb}$$

37

38 Atmosphere and ocean oxygen:

$$39 \frac{dO}{dx} = f_{locb} + f_{mocb} - f_{oxidw} - f_{ocdeg} + 2(f_{mpsb} - f_{pyrw} - f_{pyrdeg} - PYR_{input}) - f_{DOC_{ox}} \\ 40 \quad \quad \quad - f_{reduct}$$

41 Hydrosphere carbon:

$$42 \frac{dA}{dx} = f_{oxidw} + f_{carbw} + f_{ocdeg} + f_{ccdeg} - f_{locb} - f_{mocb} - f_{mccb} - f_{sfw} + DOC_{ox} + f_{reduct}$$

43

44 Marine sulfate:

$$45 \frac{dS}{dx} = f_{gypw} + f_{pyrw} + f_{gypdeg} + f_{pyrdeg} - f_{mpsb} - f_{mgsb} + PYR_{input} + GYP_{input}$$

46

$$47 \text{ Buried organic carbon: } \frac{dG}{dx} = f_{locb} + f_{mocb} - f_{oxidw} - f_{ocdeg}$$

48

$$49 \text{ Buried carbonate carbon: } \frac{dC}{dx} = f_{mccb} + f_{sfw} - f_{carbw} - f_{ccdeg}$$

50

$$51 \text{ Buried pyrite S: } \frac{dPYR}{dx} = f_{mpsb} - f_{pyrw} - f_{pyrdeg} - PYR_{input}$$

52

$$53 \text{ Buried gypsum S: } \frac{dGYP}{dx} = f_{mgsb} - f_{gypw} - f_{gypdeg} - GYP_{input}$$

54

$$55 \text{ Marine nitrate: } \frac{dN}{dx} = f_{nfix} - f_{denit} - f_{monb}$$

56

$$57 \text{ Marine DOC: } \frac{dDOC}{dx} = -DOC_{ox}$$

58

#### 59 **4. Model fluxes**

60 Model fluxes are described below. They generally take the form of a present day rate  
61 multiplied by a series of scalings, which include the size of the parent reservoir, forcing  
62 factors, and non-flux calculations such as temperature or the degree of marine anoxia.

63

64 **Degassing: sediment to hydrosphere**

65 Carbonate C degassing:  $f_{ccdeg} = k_{ccdeg} \cdot D \cdot B \cdot \left(\frac{C}{C_0}\right)$

66 Organic C degassing:  $f_{ccdeg} = k_{ocdeg} \cdot D \cdot \left(\frac{G}{G_0}\right)$

67 Pyrite S degassing:  $f_{pyrdeg} = k_{pyrdeg} \cdot D \cdot \left(\frac{PYR}{PYR_0}\right)$

68 Gypsum S degassing:  $f_{gypdeg} = k_{gypdeg} \cdot D \cdot \left(\frac{GYP}{GYP_0}\right)$

69

70 **Weathering: sediment to hydrosphere**

71 Oxidative C weathering:  $f_{oxidw} = k_{oxidw} \cdot U^{Usil} \cdot \left(\frac{G}{G_0}\right) \cdot \left(\frac{O}{O_0}\right)^{0.5}$

72 Carbonate C weathering:  $f_{carbw} = k_{carbw} \cdot U^{Ucarb} \cdot \left(\frac{C}{C_0}\right) \cdot CA \cdot PG \cdot f_{biota} \cdot g_T$

73 Pyrite S weathering:  $f_{pyrw} = k_{pyrw} \cdot U^{Usil} \cdot \left(\frac{PYR}{PYR_0}\right)$

74 Gypsum S weathering:  $f_{gypw} = k_{gypw} \cdot \frac{f_{carbw}}{k_{carbw}} \cdot \left(\frac{GYP}{GYP_0}\right)$

75 Pyrite S additional input:  $PYR_{input} = k_{pyrw} \cdot EVAP$

76 Gypsum S additional input:  $GYP_{input} = k_{gypw} \cdot EVAP$

77 Phosphorus weathering:

78  $f_{phosw} = k_{phosw} \cdot EP \cdot \left\{ k_{psil} \left(\frac{f_{silw}}{k_{silw}}\right) + k_{pcarb} \left(\frac{f_{carbw}}{k_{carbw}}\right) + k_{pox} \left(\frac{f_{oxidw}}{k_{oxidw}}\right) \right\}$

79

80 **Burial: hydrosphere to sediment**

81 Marine organic C burial:  $f_{mocb} = k_{mocb} \cdot \left(\frac{newp}{newp_0}\right)^2 \cdot CB$

82 Land organic C burial:  $f_{locb} = k_{locb} \cdot \left(\frac{pland}{pland_0}\right) \cdot CP_{land}$

83 Marine carbonate burial:  $f_{mccb} = f_{silw} + f_{carbw}$

84 Seafloor weathering:  $f_{sfw} = k_{sfw} \cdot f_{T_{sfw}} \cdot D$

85 Marine pyrite S burial:

$$86 \quad f_{mpsb} = k_{mpsb} \cdot \left(\frac{S}{S_0}\right) \cdot \left(\frac{O_0}{O}\right) \cdot \left(\frac{f_{mocb}}{k_{mocb}}\right) + \frac{4}{5} (PYR_{input} + GYP_{input})$$

87 Marine gypsum S burial:

$$88 \quad f_{mgsb} = k_{mgsb} \cdot \left(\frac{S}{S_0}\right) + \frac{1}{5} (PYR_{input} + GYP_{input})$$

$$89 \quad \text{Fe-phosphate burial:} \quad f_{fepb} = k_{fepb} \cdot \left(\frac{1-ANOX}{k_{oxfrac}}\right) \cdot \left(\frac{P}{P_0}\right)$$

$$90 \quad \text{Ca-phosphate burial:} \quad f_{capb} = k_{capb} \cdot \left(\frac{f_{mocb}}{k_{mocb}}\right)$$

$$91 \quad \text{Organic P burial:} \quad f_{mopb} = f_{mocb} \left( \left(\frac{f_{biot}}{CP_{biot}}\right) + \left(\frac{1-f_{biot}}{CP_{lam}}\right) \right)$$

$$92 \quad \text{Organic N burial:} \quad f_{monb} = \left(\frac{f_{mocb}}{CN_{sea}}\right)$$

93

94 **Internal fluxes:**

$$95 \quad \text{Granite weathering:} \quad f_{granw} = k_{granw} \cdot U^{kw_{sil}} \cdot GA \cdot PG \cdot f_{biota} \cdot f_{T_{gran}}$$

$$96 \quad \text{Basalt weathering:} \quad f_{basw} = k_{basw} \cdot BA \cdot PG \cdot f_{biota} \cdot f_{T_{bas}}$$

$$97 \quad \text{Silicate weathering:} \quad f_{silw} = f_{granw} + f_{basw}$$

$$98 \quad \text{Denitrification:} \quad f_{denit} = k_{denit} \cdot \left(1 + \left(\frac{ANOX}{1-k_{oxfrac}}\right)\right) \cdot \left(\frac{N}{N_0}\right)$$

99 Nitrogen fixation:

$$100 \quad f_{nfix} = \begin{cases} k_{nfix} \cdot \left(\frac{P - \frac{N}{16}}{P_0 - \frac{N_0}{16}}\right)^2 & , \quad \frac{N}{16} < P \\ 0 & , \quad \frac{N}{16} \geq P \end{cases}$$

101

$$102 \quad \text{Marine new production:} \quad newp = 117 \cdot \min\left(\frac{[N]}{16}, [P]\right)$$

$$103 \quad \text{P flux to land:} \quad p_{land} = k_{landfrac} \cdot VEG \cdot f_{phosw} \cdot (k_{aq} + (1 - k_{aq}) \cdot COALF)$$

$$104 \quad \text{P flux to sea:} \quad p_{sea} = f_{phosw} - p_{land}$$

105

106 **5. Non-flux calculations**

107 Carbon atmospheric fraction  $atfrac = atfrac_0 \cdot \left(\frac{A}{A_0}\right)$

108 Relative atmospheric CO<sub>2</sub>:  $RCO_2 = \left(\frac{A}{A_0}\right) \cdot \left(\frac{atfrac}{atfrac_0}\right)$

109 Atmospheric O<sub>2</sub> mixing ratio:  $O_{2mr} = \frac{\frac{o}{o_0}}{\frac{o}{o_0} + k_{mr}}$

110 Global average surface temperature:  $T_{gast} = 15 + climsens \cdot \frac{\log RCO_2}{\log(2)} - k_l \cdot \left(\frac{t}{570}\right)$

111 Average temperature for weathering:  $T_{surf} = T_{gast} \cdot k_{Tgradm} + k_{Tgradc}$

112 Granite weathering T effect:

113  $f_{Tgran} = e^{0.0724(T_{surf}-15)} \cdot \left(1 + 0.038 \cdot (T_{surf} - 15)\right)^{0.65}$

114 Basalt weathering T effect:

115  $f_{Tbas} = e^{0.0608(T_{surf}-15)} \cdot \left(1 + 0.038 \cdot (T_{surf} - 15)\right)^{0.65}$

116 Carbonate weathering T effect:  $g_T = 1 + 0.087(T_{surf} - 15)$

117 Seafloor weathering T effect:  $f_{Tsfw} = e^{0.0608(T_{surf}-15)}$

118 Temperature effect on vegetation:  $V_T = 1 - \left(\frac{T_{surf}-25}{25}\right)^2$

119 CO<sub>2</sub> effect on vegetation:  $V_{CO_2} = \frac{CO_2ppm - p_{minim}}{p_{half} + p_{atm} - p_{minim}}$

120 Oxygen effect on vegetation:  $V_{O_2} = 1.5 - 0.5\left(\frac{o}{o_0}\right)$

121 Overall limitation of terrestrial NPP:  $V_{NPP} = 2 \cdot EVO \cdot V_T \cdot V_{CO_2} \cdot V_{O_2}$

122 Fire ignition probability scaling:  $ignit = \min(\max(48 \cdot O_{2mr} - 9.08, 0))$

123 Fire effect on terrestrial biomass:  $firef = \frac{k_{fire}}{k_{fire} - 1 + ignit}$

124 Mass of terrestrial biota:  $VEG = V_{NPP} \cdot firef$

125 Terrestrial biota weathering effect:

127  $f_{biota} = \{1 - \min(V \cdot W, 1)\} \cdot k_{plantenhance} \cdot RCO_2^{0.5} + V \cdot W$

126 Marine P concentration:  $[P] = 2.2 \left(\frac{P}{P_0}\right)$

128 Marine N concentration:  $[N] = 30.9 \left(\frac{N}{N_0}\right)$

129 Marine anoxic fraction:  $ANOX = \frac{1}{1 + e^{-k_{anox} \cdot \left(k_u \left(\frac{newp}{newp_0}\right) - \left(\frac{O}{O_0}\right)\right)}}$

130 Hydrothermal reductant input:  $f_{reduct} = k_{reduct} \cdot D$

131 Marine DOC oxidation:

132  $f_{DOC_{ox}} = \begin{cases} 0 & , \quad DOC < 1 \times 10^{12} \text{ mol} \\ -\frac{k_{DOC}}{1 + e^{-a_{DOC}(1-ANOX-c_{DOC})}} \left(\frac{DOC}{DOC_0}\right) & , \quad DOC \geq 1 \times 10^{12} \text{ mol} \end{cases}$

133

## 134 6. Forcing factors

135 All model forcing factors are detailed below. All have the value of 1 at the present day and are  
136 nondimensional.

| Description                      | Name                     | Based on                                       |
|----------------------------------|--------------------------|------------------------------------------------|
| Tectonic degassing               | <i>D</i>                 | Reconstructed subduction zone and rift lengths |
| Continental uplift               | <i>U</i>                 | Sediment abundance                             |
| Carbonate burial depth           | <i>B</i>                 | Fossil record                                  |
| Basalt silicate exposed area     | <i>BA</i>                | Degassing and flood basalt emplacements        |
| Granite silicate exposed area    | <i>GA</i>                | Paleogeographic reconstruction                 |
| Land plant evolution             | <i>EVO</i>               | Fossil record                                  |
| Land plant weathering effect     | <i>W</i>                 | Experimental and field studies                 |
| Land plant C:P ratio             | <i>CP<sub>land</sub></i> | Sedimentary coal deposition record             |
| Selective P weathering           | <i>EP</i>                | Experimental studies                           |
| Paleogeog. weathering effect     | <i>PG</i>                | Climate modelling                              |
| Coal basin depositional fraction | <i>COALF</i>             | Coal basin depositional area                   |
| Evaporite weathering spike       | <i>EVAP</i>              | Evidence for evaporite exposure                |
| Bioturbation                     | <i>f<sub>biot</sub></i>  | Burrowing depth reconstruction                 |
| Bioturbation effect on C burial  | <i>CB</i>                | Field studies                                  |

137

138 **7. Fixed parameters**

139 Fixed parameters are shown in the table below.

| Description                                        | Name            | Value                                                      |
|----------------------------------------------------|-----------------|------------------------------------------------------------|
| Present day marine organic carbon burial           | $k_{mocb}$      | $2.5 \times 10^{12}$ mol C yr <sup>-1</sup>                |
| Present day land organic carbon burial             | $k_{locb}$      | $2.5 \times 10^{12}$ mol C yr <sup>-1</sup>                |
| Present day organic carbon degassing               | $k_{ogdeg}$     | $1.25 \times 10^{12}$ mol C yr <sup>-1</sup>               |
| Present day organic carbon weathering              | $k_{oxidw}$     | $3.35 \times 10^{12}$ mol C yr <sup>-1</sup>               |
| Present day carbonate burial                       | $k_{mccb}$      | $2.125 \times 10^{13}$ mol C yr <sup>-1</sup>              |
| Present day carbonate degassing                    | $k_{ccdeg}$     | $1.5 \times 10^{13}$ mol C yr <sup>-1</sup>                |
| Present day carbonate weathering                   | $k_{carbw}$     | $8 \times 10^{12}$ mol C yr <sup>-1</sup>                  |
| Present day seafloor weathering                    | $k_{sfw}$       | $1.75 \times 10^{12}$ mol C yr <sup>-1</sup>               |
| Present day basalt weathering                      | $k_{basw}$      | $3.975 \times 10^{12}$ mol C yr <sup>-1</sup>              |
| Present day granite weathering                     | $k_{granw}$     | $9.275 \times 10^{12}$ mol C yr <sup>-1</sup>              |
| Present day silicate weathering                    | $k_{sil}$       | $1.325 \times 10^{13}$ mol C yr <sup>-1</sup>              |
| Present day phosphorus weathering                  | $k_{phosw}$     | $4.25 \times 10^{10}$ mol P yr <sup>-1</sup>               |
| Present day pyrite burial                          | $k_{mpsb}$      | $7 \times 10^{11}$ mol S yr <sup>-1</sup>                  |
| Present day gypsum burial                          | $k_{mgsb}$      | $1.5 \times 10^{12}$ mol S yr <sup>-1</sup>                |
| Present day pyrite weathering                      | $k_{pyrw}$      | $4.5 \times 10^{11}$ mol S yr <sup>-1</sup>                |
| Present day gypsum weathering                      | $k_{gypw}$      | $1 \times 10^{12}$ mol S yr <sup>-1</sup>                  |
| Present day pyrite degassing                       | $k_{pyrdeg}$    | $2.5 \times 10^{11}$ mol S yr <sup>-1</sup>                |
| Present day gypsum degassing                       | $k_{gypdeg}$    | $5 \times 10^{11}$ mol S yr <sup>-1</sup>                  |
| Present day Ca-P burial                            | $k_{capb}$      | $2 \times 10^{10}$ mol P yr <sup>-1</sup>                  |
| Present day Fe-P burial                            | $k_{fepb}$      | $1 \times 10^{10}$ mol P yr <sup>-1</sup>                  |
| Present day nitrogen fixation                      | $k_{nfix}$      | $8.67 \times 10^{12}$ mol N yr <sup>-1</sup>               |
| Present day denitrification                        | $k_{denit}$     | $4.3 \times 10^{12}$ mol N yr <sup>-1</sup>                |
| Present day hydrothermal reductant input           | $k_{reductant}$ | $4 \times 10^{11}$ mol O <sub>2</sub> eq. yr <sup>-1</sup> |
| Present day ocean oxic fraction                    | $k_{oxfrac}$    | 0.9975                                                     |
| Atmospheric O <sub>2</sub> mixing ratio conversion | $k_{mr}$        | 3.762                                                      |
| Pre-plant weathering enhancement factor            | $k_{preplant}$  | 0.25                                                       |
| Uplift effect on carbonate weathering              | $kW_{carb}$     | 0.9                                                        |
| Uplift effect on silicate weathering               | $kW_{sil}$      | 0.33                                                       |



|                                                     |                |                                           |
|-----------------------------------------------------|----------------|-------------------------------------------|
| Phosphorus input from silicate weathering           | $kp_{sil}$     | 0.8                                       |
| Phosphorus input from carbonate weathering          | $kp_{carb}$    | 0.14                                      |
| Phosphorus input from organic carbon oxidation      | $kp_{ox}$      | 0.06                                      |
| Fraction of phosphorus buried on land               | $k_{landfrac}$ | 0.0588                                    |
| C:P ratio of buried marine organics                 | $CP_{sea}$     | 250                                       |
| C:N ratio of buried marine organics                 | $CN_{sea}$     | 37.5                                      |
| Present day atmospheric fraction of CO <sub>2</sub> | $atfrac_0$     | 0.01614                                   |
| Long-term climate sensitivity                       | $climsens$     | 5 K                                       |
| Solar luminosity difference at 570 Ma               | $k_l$          | 7.4 W m <sup>-2</sup>                     |
| Latitudinal temperature gradient slope              | $k_{Tgradm}$   | 0.66                                      |
| Latitudinal temperature gradient constant           | $k_{Tgradc}$   | 4.95                                      |
| Vegetation CO <sub>2</sub> minimum                  | $p_{minimum}$  | 10 ppm                                    |
| Vegetation CO <sub>2</sub> half saturation          | $p_{half}$     | 183.6 ppm                                 |
| Fire effect on vegetation biomass                   | $k_{fire}$     | 3                                         |
| Terrestrial-aquatic organic matter burial fraction  | $k_{aaq}$      | 0.8                                       |
| Steepness of anoxia transition                      | $k_{anox}$     | 10                                        |
| Marine oxygen utilization parameter                 | $k_u$          | 0.4                                       |
| DOC oxidation slope parameter                       | $a_{DOC}$      | 300                                       |
| DOC oxidation threshold parameter                   | $c_{DOC}$      | 0.5                                       |
| DOC oxidation rate parameter                        | $k_{DOC}$      | $1 \times 10^{14}$ mol C yr <sup>-1</sup> |
| C:P burial ratio bioturbated sediment               | $CP_{biot}$    | 250                                       |
| C:P burial ratio laminated sediment                 | $CP_{lam}$     | 1000                                      |

140

## 141 **8. References**

142 Lenton TM, Daines SJ, Mills BJW. COPSE reloaded: an improved model of biogeochemical  
143 cycling over Phanerozoic time. *Earth-Science Reviews* **178**, 1-28 (2018).

144

145 Mills BJW, Krause AJ, Scotese CR, Hill DJ, Shields GA, Lenton TM. Modelling the long-  
146 term carbon cycle, atmospheric CO<sub>2</sub>, and Earth surface temperature from late  
147 Neoproterozoic to present day. *Gondwana Research* **67**, 172-186 (2019).

148

149 Shields GA, Mills BJW, Zhu M, Raub TD, Daines SJ, Lenton TM. Unique Neoproterozoic  
150 carbon isotope excursions sustained by coupled evaporite dissolution and pyrite burial.  
151 *Nature Geoscience* **12**, 823-827 (2019).

152

153 van de Velde S, Mills BJW, Meysman FJR, Lenton TM, Poulton SW. Early Palaeozoic ocean  
154 anoxia and global warming driven by the evolution of shallow burrowing. *Nature*  
155 *Communications*. **9**, 2554 (2018).  
156  
157 Williams JJ, Mills BJW, Lenton TM. A Tectonically Driven Ediacaran Oxygenation Event.  
158 *Nature Communications* **10**, 2690 (2019).
